# Supplementary material
Source: PubMed Central journal article supplement (PMC10423557)

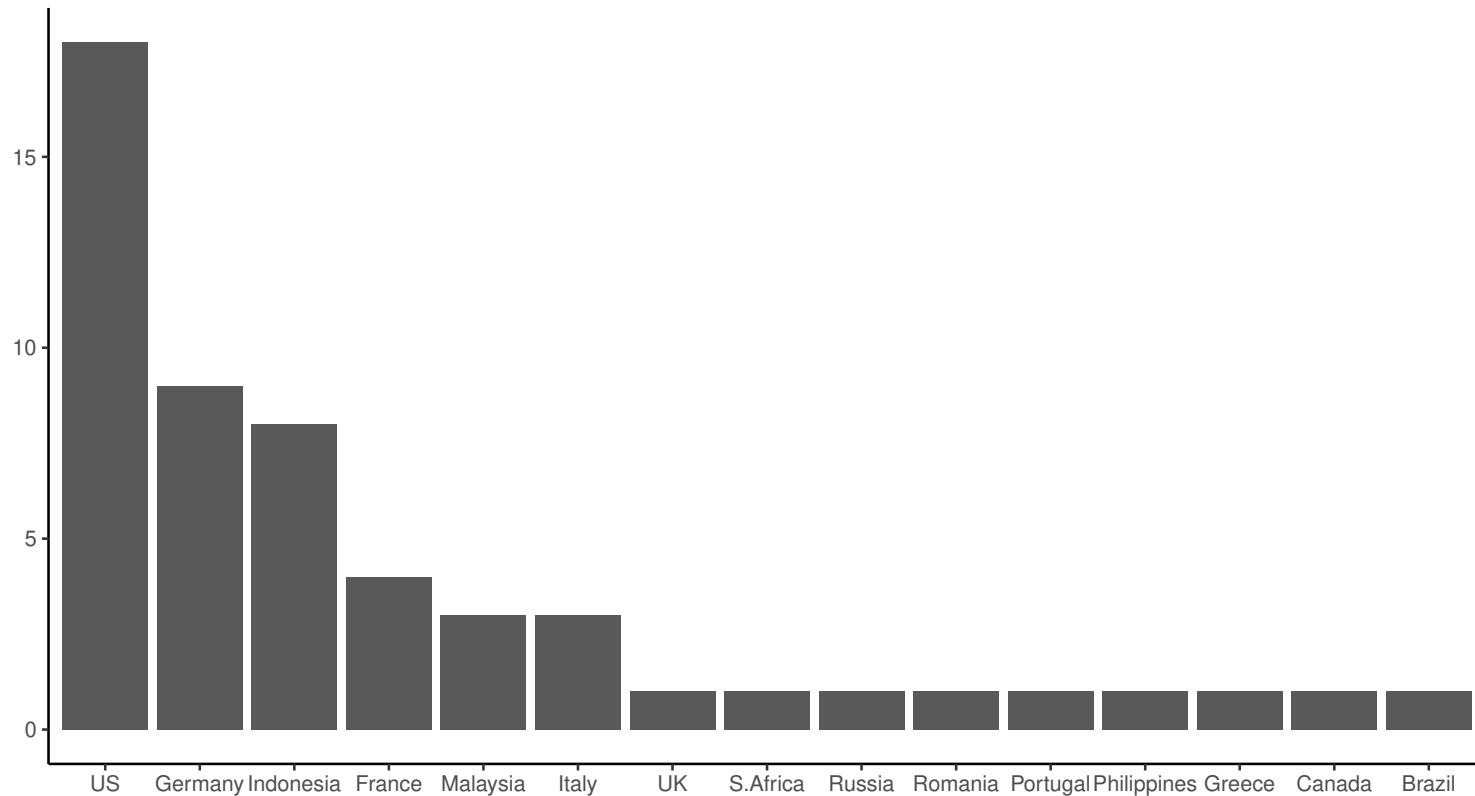

Supplement: tobaccocontrol-2021-057053supp001.pdf [file tobaccocontrol-2021-057053supp001.pdf]

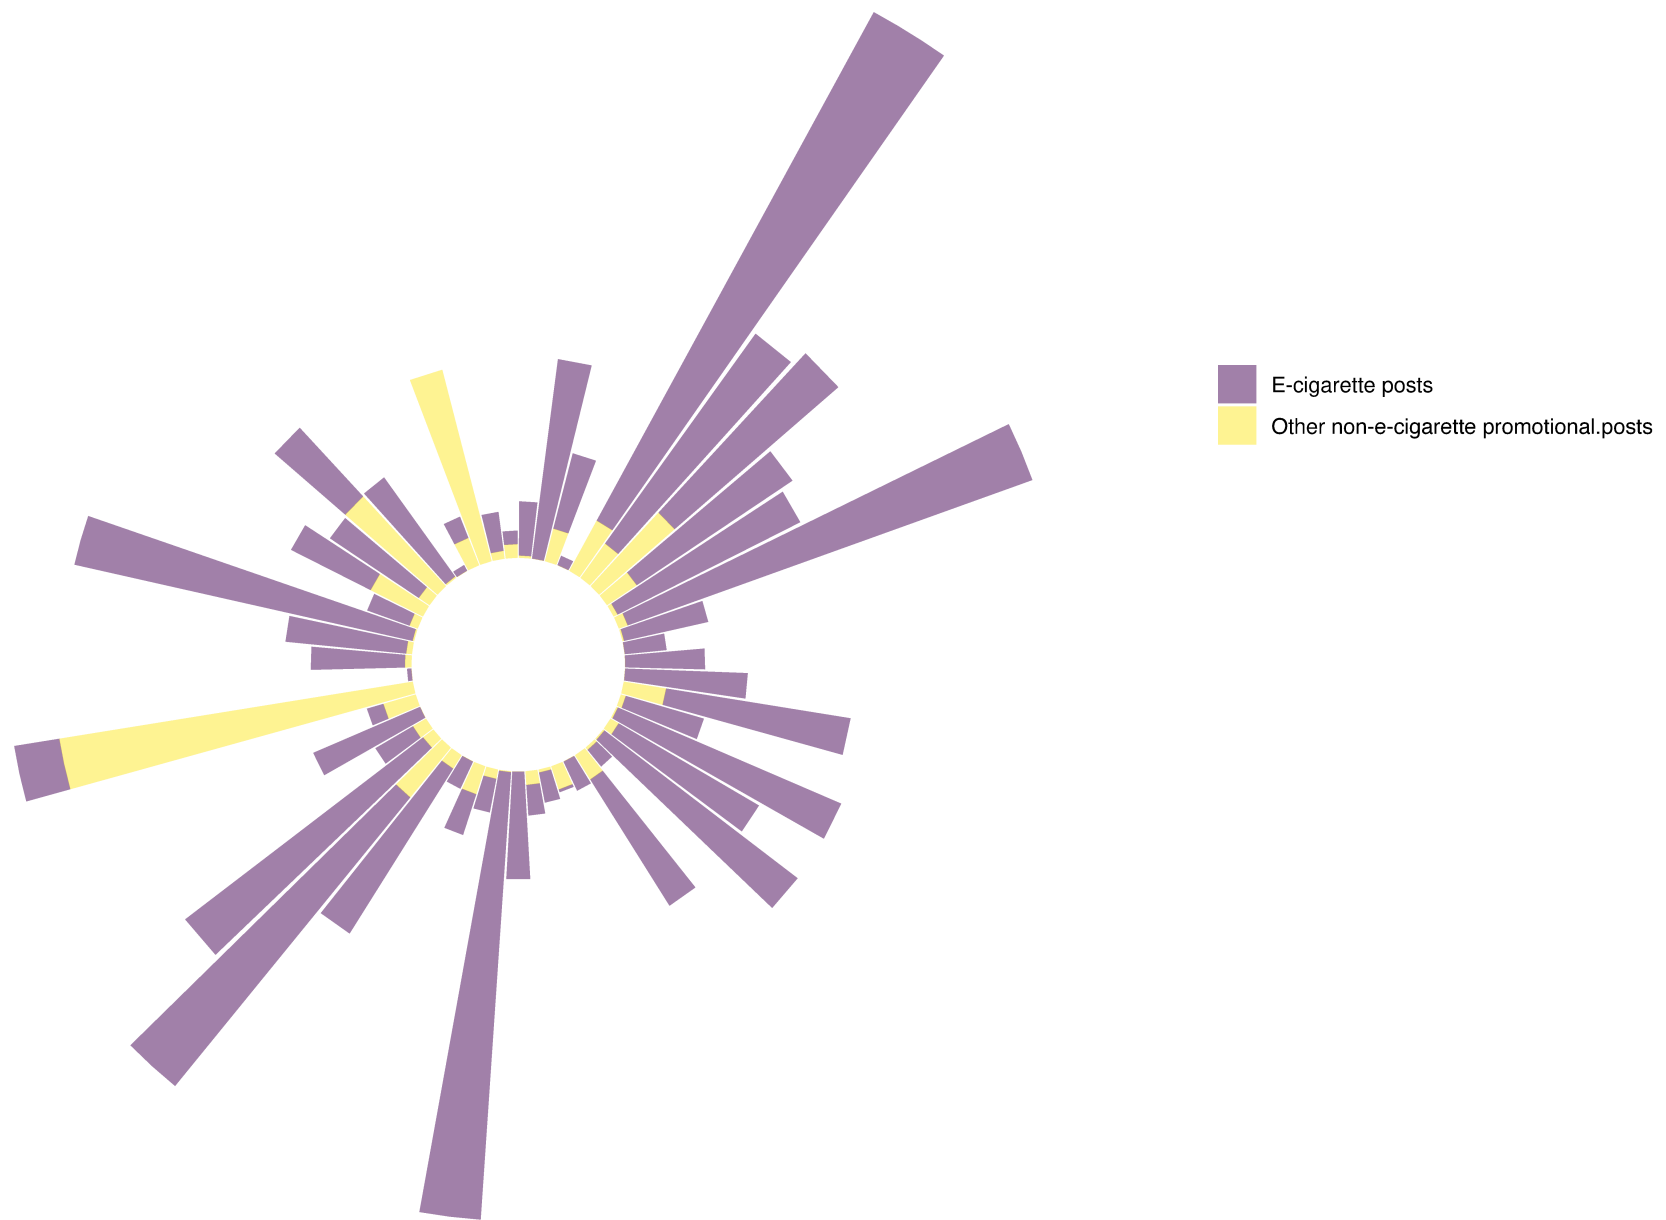

Supplement: tobaccocontrol-2021-057053supp002.pdf [file tobaccocontrol-2021-057053supp002.pdf]
